# Supplementary material for: Quality of Life Measurement in Dogs and Cats: A Scoping Review of Generic Tools
Source: MDPI journal article supplement (doi:10.3390/ani12030400), 2022-02-08
Supplement: s1 [file s1]

## Supplementary data

**Table S1.** Examples of commonly included items for each of the nine QoL assessment tools.

| Potentially valuable aspect of QoL             | Noble et al (2019) [30]                                                                                                                                                | Tatlock et al (2017) [31]                                         | Freeman et al (2016) [16]                                                                                                                                                                | Bijsmans et al (2016) [26]                                                                                                                                                                                  | Lavan (2013) [32]                                                                                                  | Yeates et al (2011) [33]                                                                                          | Villalobos (2011) [13]                                                     | Mullan and Main (2007) [19]                                                                                                                                                             | Wojciechowska et al (2005) [34]                                                           |
|------------------------------------------------|------------------------------------------------------------------------------------------------------------------------------------------------------------------------|-------------------------------------------------------------------|------------------------------------------------------------------------------------------------------------------------------------------------------------------------------------------|-------------------------------------------------------------------------------------------------------------------------------------------------------------------------------------------------------------|--------------------------------------------------------------------------------------------------------------------|-------------------------------------------------------------------------------------------------------------------|----------------------------------------------------------------------------|-----------------------------------------------------------------------------------------------------------------------------------------------------------------------------------------|-------------------------------------------------------------------------------------------|
| <b>Activity</b>                                | Please tell us how well this word describes your cat as he is today: Active.<br><br>7-point Likert scale (0 = Couldn't be more active, 6 = not at all active)          | In the past 4 weeks my cat has been inactive or has had no energy | Thinking about just the last seven days..... my cat was full of energy/lively/seemed tired<br><br>6-point Likert scale (1 = always, 6 = never)                                           | General health. Q4a. How active was your cat during the past week?<br><br>4-point Likert scale (1 = very active, 4 = very inactive)                                                                         | Physical functioning. My pet is as active as he/she has been<br><br>5-point Likert scale (1 = disagree, 5 = agree) | Exercise.<br><br>Visual analogue scale, left side 'rarely exercised', right side 'several hours a day'            | Mobility – Does the animal want to go for a walk?                          | Exercise. Describe your dog's exercise (where, when, how long, quality and freedom on walks)                                                                                            | During the last seven days, how often would you say that _____ has been taken for a walk? |
| <b>Interaction with humans or surroundings</b> | Please tell us how well this word describes your cat as he is today: Exploring.<br><br>7-point Likert scale (0 = Couldn't be more exploring, 6 = not at all exploring) | In the past 4 weeks my cat has been affectionate towards me       | Thinking about just the last seven days.... my cat was curious about his/her surroundings/greeted me when I returned from being away<br><br>6-point Likert scale (1 = always, 6 = never) | Behaviour. Q3a. How interactive has your cat been during the past week?<br><br>6-point Likert scale (1 = not interactive at all, 6 = extremely interactive)                                                 | Happiness. My pet wants to play<br><br>5-point Likert scale (1 = disagree, 5 = agree)                              | Company of humans<br><br>Visual analogue scale, left side 'often alone', right side 'never without human company' | Happiness – is the pet responsive to things around it (e.g. family, toys)? | Companionship. Do you think a change to the amount and type of companionship your dog has would improve his/her wellbeing?<br><br>4-point Likert scale (1 = not at all, 4 = completely) | How often during the last seven days did you see _____ playing with toys?                 |
| <b>Appetite</b>                                |                                                                                                                                                                        | In the past 4 weeks my cat has had a healthy appetite             | Thinking about just the last seven days.... my cat had a good appetite/enjoyed his food<br><br>6-point Likert scale (1 = always, 6 = never)                                              | Eating. Q5a. How would you describe your cat's appetite during the past week?<br><br>4-point Likert scale (1 = normal, 4 = Not normal at all: he/she had a ravenous appetite or did not want to eat at all) |                                                                                                                    | Food<br><br>Visual analogue scale, left side 'too fat/too thin', right side 'good weight and never hungry'        | Hunger – is the pet eating enough?                                         | Diet. Describe your dog's diet (what, when and where your dog eats and drinks)                                                                                                          | Thinking about the last seven days, would you say that _____ enjoyed his food?            |

**Table S2.** Examples of commonly included items for the four QoL assessment tools designed for cats.

| Potentially valuable aspect of QoL | Noble et al (2019) [30]                                                                                                                                 | Tatlock et al (2017) [31]                                            | Freeman et al (2016) [16]                                                                                              | Bijsmans et al (2016) [26]                                                                                                                                                                                                                                          |
|------------------------------------|---------------------------------------------------------------------------------------------------------------------------------------------------------|----------------------------------------------------------------------|------------------------------------------------------------------------------------------------------------------------|---------------------------------------------------------------------------------------------------------------------------------------------------------------------------------------------------------------------------------------------------------------------|
| <b>Mood</b>                        | Please tell us how well this word describes your cat as he is today: Happy.<br><br>7-point Likert scale (0 = Couldn't be more happy, 6 = not all happy) | In the past 4 weeks my cat has appeared happy                        | Thinking about just the last 7 days..... my cat was irritable/friendly/relaxed/approachable                            | Behaviour. Q1a. How would you describe your cat's behaviour during the past week?<br><br>4-point Likert scale (1 = my cat seems happy; he/she behaves like a normal cat, 4 = my cat does not seem happy at all: he/she constantly behaves as if something is wrong) |
| <b>Grooming</b>                    |                                                                                                                                                         | In the past 4 weeks my cat has been grooming itself as much as usual | Thinking about just the last 7 days..... my cat's coat or fur looked shiny/felt soft/looked dull/looked thick and full | Behaviour. Q6a. How has your cat's grooming been during the past week?<br><br>7-point Likert scale (1 = did not groom at all, 7 = grooming all the time)                                                                                                            |
